# Supplementary material for: Nectar non-protein amino acids (NPAAs) do not change nectar palatability but enhance learning and memory in honey bees
Source: PubMed Central journal article supplement (PMC8175726; doi:10.1038/s41598-021-90895-z), 2021-06-03
Supplement: 41598_2021_90895_MOESM1_ESM.pdf [file 41598_2021_90895_MOESM1_ESM.pdf]

## **SUPPLEMENTARY INFORMATION**

### **Nectar non-protein amino acids (NPAAs) do not change nectar palatability but enhance learning and memory in honey bees**

Daniele Carlesso<sup>1</sup>, Stefania Smargiassi<sup>2</sup>, Elisa Pasquini<sup>3</sup>, Giacomo Bertelli<sup>3</sup>, David Baracchi<sup>3</sup>

<sup>1</sup> *Department of Biological Sciences, Macquarie University, Sydney, NSW 2109, Australia*

<sup>2</sup> *Department of Life Sciences and Systems Biology, University of Turin, Via Accademia Albertina 13, Turin 10123, Italy*

<sup>3</sup> *Department of Biology, University of Florence, Via Madonna del Piano, 6, 50019 Sesto Fiorentino, Italy*

## Results

### Exp 3 – Influence of NPAAAs on feeding and mortality

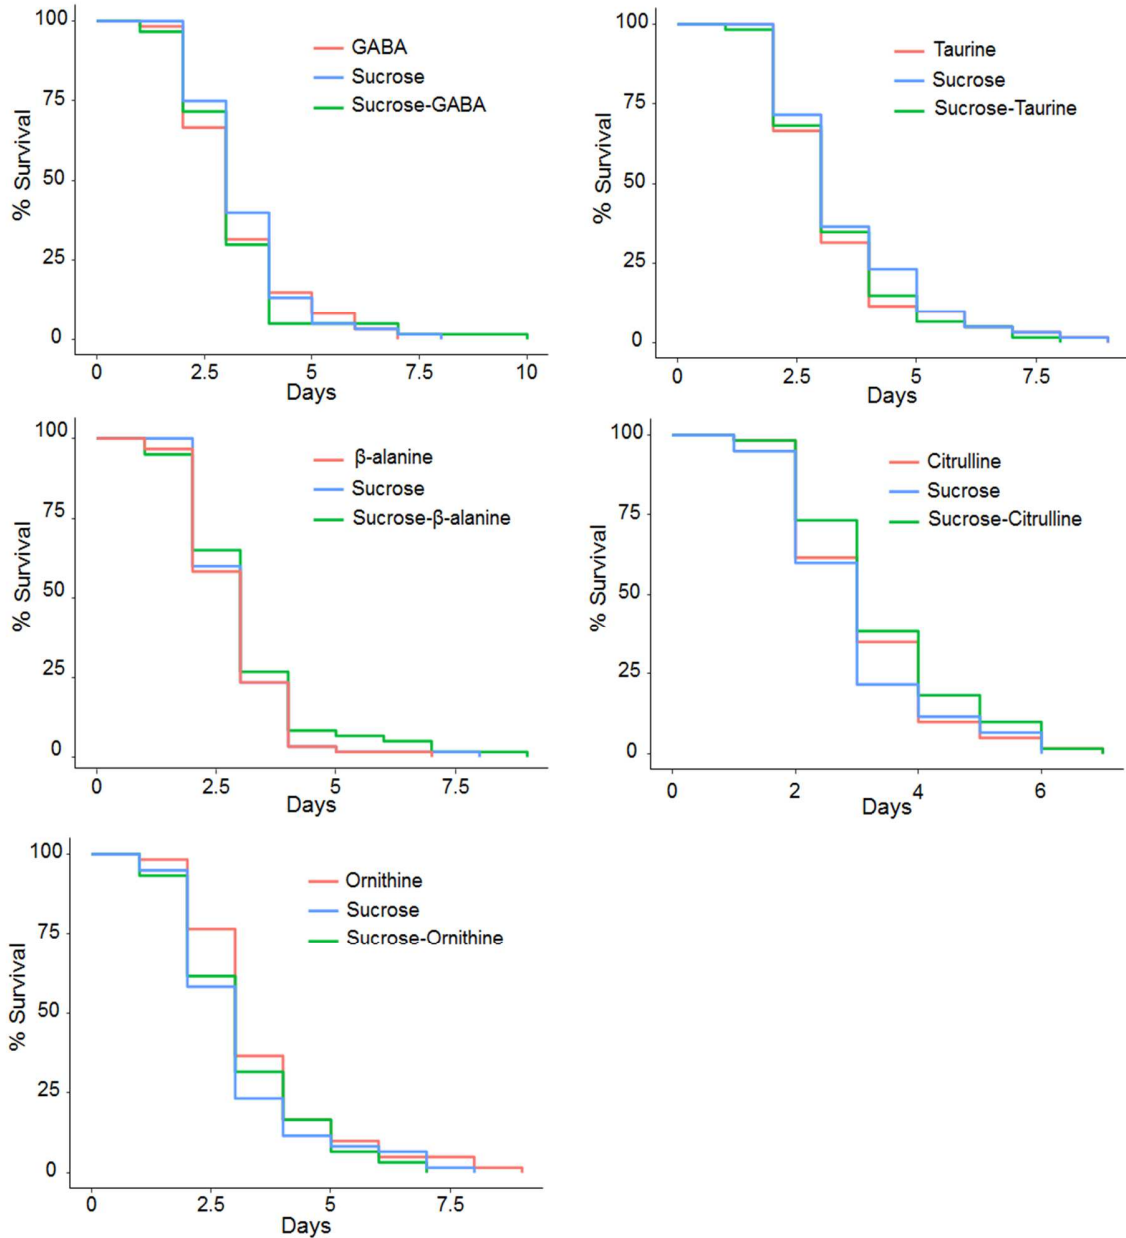

**Figure S1: NPAAAs did not affect caged honey bee survival.** Cumulative survival of bees kept in caged conditions under three different feeding regimes for a period of 10 days: Sucrose only (S-S); NPAA-laced solution only (NPAA-NPAA); Sucrose and NPAA-laced solution (S-NPAA). None of the NPAAAs was a significant predictor of mortality in any feeding regime (Log-rank Mantel Cox test, GABA:  $p=0.68$ ;  $\beta$ -ALA:  $p=0.52$ ; TAU:  $p=0.68$ ; CIT:  $p=0.20$ ; ORN:  $p=0.25$ ).

#### ***Exp 4 – Contextual absolute olfactory learning***

For all *unpaired* groups, we observed no significant increase in responses during conditioning apart from  $\beta$ -alanine (GLMM, *trial*: GABA,  $\chi^2=0.15$ ,  $df=1$ ,  $p=0.70$ ;  $\beta$ -ALA,  $\chi^2=4.32$ ,  $df=1$ ,  $p=0.04$ ; TAU,  $\chi^2=1.26$ ,  $df=1$ ,  $p=0.26$ ; CIT,  $\chi^2=0.19$ ,  $df=1$ ,  $p=0.66$ ; ORN,  $\chi^2=0.59$ ,  $df=1$ ,  $p=0.44$ , Fig. 4), nor an effect of the treatment (GLMM, *treat*: GABA,  $\chi^2=0.04$ ,  $df=1$ ,  $p=0.84$ ;  $\beta$ -ALA,  $\chi^2=0.13$ ,  $df=1$ ,  $p=0.71$ ; TAU,  $\chi^2=0.01$ ,  $df=1$ ,  $p=0.93$ ; CIT,  $\chi^2=0.0$ ,  $df=1$ ,  $p=0.99$ ; ORN,  $\chi^2=0.001$ ,  $df=1$ ,  $p=0.98$ , Fig. 4 in the main document). Accordingly, bees in the *unpaired* groups did not differ in acquisition scores for any of the NPAAAs (Mann-Whitney U test, *ACQS*: GABA,  $W=771$ ,  $p=0.92$ ;  $\beta$ -ALA,  $W=818$ ,  $p=0.39$ ; TAU,  $W=740$ ,  $p=0.15$ ; CIT,  $W=861$ ,  $p=0.34$ ; ORN,  $W=722$ ,  $p=0.1$ ). These results thus confirmed the occurrence of a true associative learning phenomenon in the *paired* groups.

In all the *unpaired* groups NPAAAs did not alter bees' responses to the conditioned odorant ( $\chi^2$  test, *CS*: GABA,  $\chi^2=0.14$ ,  $p=0.71$ ;  $\beta$ -ALA,  $\chi^2=0.37$ ,  $p=0.54$ ; TAU,  $\chi^2=0.38$ ,  $p=0.55$ ; CIT,  $\chi^2=2.67$ ,  $p=0.10$ ; ORN,  $\chi^2=0.24$ ,  $p=0.62$ , Fig. 4) nor to the novel odorant ( $\chi^2$  test, *Nod*: GABA,  $\chi^2=0.90$ ,  $p=0.34$ ;  $\beta$ -ALA,  $\chi^2=0.99$ ,  $p=0.32$ ; TAU,  $\chi^2=0.0003$ ,  $p=0.99$ ; CIT,  $\chi^2=1.95$ ,  $p=0.16$ ; ORN,  $\chi^2=2.00$ ,  $p=0.16$ , Fig. 4). Accordingly, we found no difference in the proportion of experimental and control bees showing CS-specific memory for any of the NPAAAs ( $\chi^2$  test, *specific memory*: GABA,  $\chi^2=0.14$ ,  $p=0.71$ ;  $\beta$ -ALA,  $\chi^2=0.37$ ,  $p=0.54$ ; TAU,  $\chi^2=1.04$ ,  $p=0.31$ ; CIT,  $\chi^2=1.77$ ,  $p=0.18$ ; ORN,  $\chi^2=0.001$ ,  $p=0.98$ , Fig. 4 in the main document).

#### ***Exp 5 – Post-feeding absolute olfactory learning***

Bees belonging to the *unpaired* groups did not increase their responses over training except with  $\beta$ -alanine (GLMM, *trial*: GABA,  $\chi^2=3.56$ ,  $df=1$ ,  $p=0.06$ ;  $\beta$ -ALA,  $\chi^2=4.87$ ,  $df=1$ ,  $p=0.03$ ; TAU,  $\chi^2=0.38$ ,  $df=1$ ,  $p=0.54$ ; CIT,  $\chi^2=1.26$ ,  $df=1$ ,  $p=0.26$ ; ORN,  $\chi^2=2.87$ ,  $df=1$ ,  $p=0.1$ , Fig. 5 in the main document). However, in all the *unpaired* groups, including  $\beta$ -alanine, pre-feeding did not alter the responses to the CS (GLMM, *treat*: GABA:  $\chi^2=0.04$ ,  $df=1$ ,  $p=0.84$ ;  $\beta$ -ALA:  $\chi^2=1.88$ ,  $df=1$ ,  $p=0.17$ ; TAU:  $\chi^2=0.0004$ ,  $df=1$ ,  $p=0.98$ ; CIT:  $\chi^2=0.06$ ,  $df=1$ ,  $p=0.81$ ; ORN:  $\chi^2=0.053$ ,  $df=1$ ,  $p=0.82$ , Fig. 5 in the main document). Accordingly, experimental and control pre-fed bees did not differ in their ACQS (Mann-Whitney U test, *ACQS*: GABA:  $W=529$ ,  $p=0.69$ ;  $\beta$ -ALA:  $W=559$ ,  $p=0.15$ ; TAU:  $W=666$ ,  $p=1$ ; CIT:  $W=841$ ,  $p=0.98$ ; ORN:  $W=665$ ,  $p=0.68$ ). Overall, the results confirmed that true associative learning occurred in the *paired* groups.

In the *unpaired* groups, no NPAA altered the responses to the CS ( $\chi^2$  test, GABA:  $\chi^2=0.94$ ,  $p=0.16$ ;  $\beta$ -ALA:  $\chi^2=0.53$ ,  $p=0.47$ ; TAU:  $\chi^2=0.001$ ,  $p=0.97$ ; CIT:  $\chi^2=1.61$ ,  $p=0.20$ ; ORN:  $\chi^2=0.56$ ,  $p=0.45$ ) or to the NOd ( $\chi^2$  test, GABA:  $\chi^2=0.72$ ,  $p=0.40$ ;  $\beta$ -ALA:  $\chi^2=1.33$ ,  $p=0.25$ ; TAU:  $\chi^2=0.001$ ,  $p=0.98$ ; CIT:  $\chi^2=1.77$ ,  $p=0.18$ ; ORN:  $\chi^2=0.11$ ,  $p=0.74$ , Fig. 5). Accordingly, *unpaired* experimental and control bees did not differ in CS-specific memory for any of the NPAAs ( $\chi^2$  test, GABA:  $\chi^2=0.24$ ,  $p=0.63$ ;  $\beta$ -ALA:  $\chi^2=0.049$ ,  $p=0.83$ ; TAU:  $\chi^2=0.38$ ,  $p=0.54$ ; CIT:  $\chi^2=0.45$ ,  $p=0.50$ ; ORN:  $\chi^2=0.21$ ,  $p=0.64$ , Fig. 5 in the main document).
